# Supplementary material
Source: PubMed Central journal article supplement (PMC3594750)

Figure 1 A and F

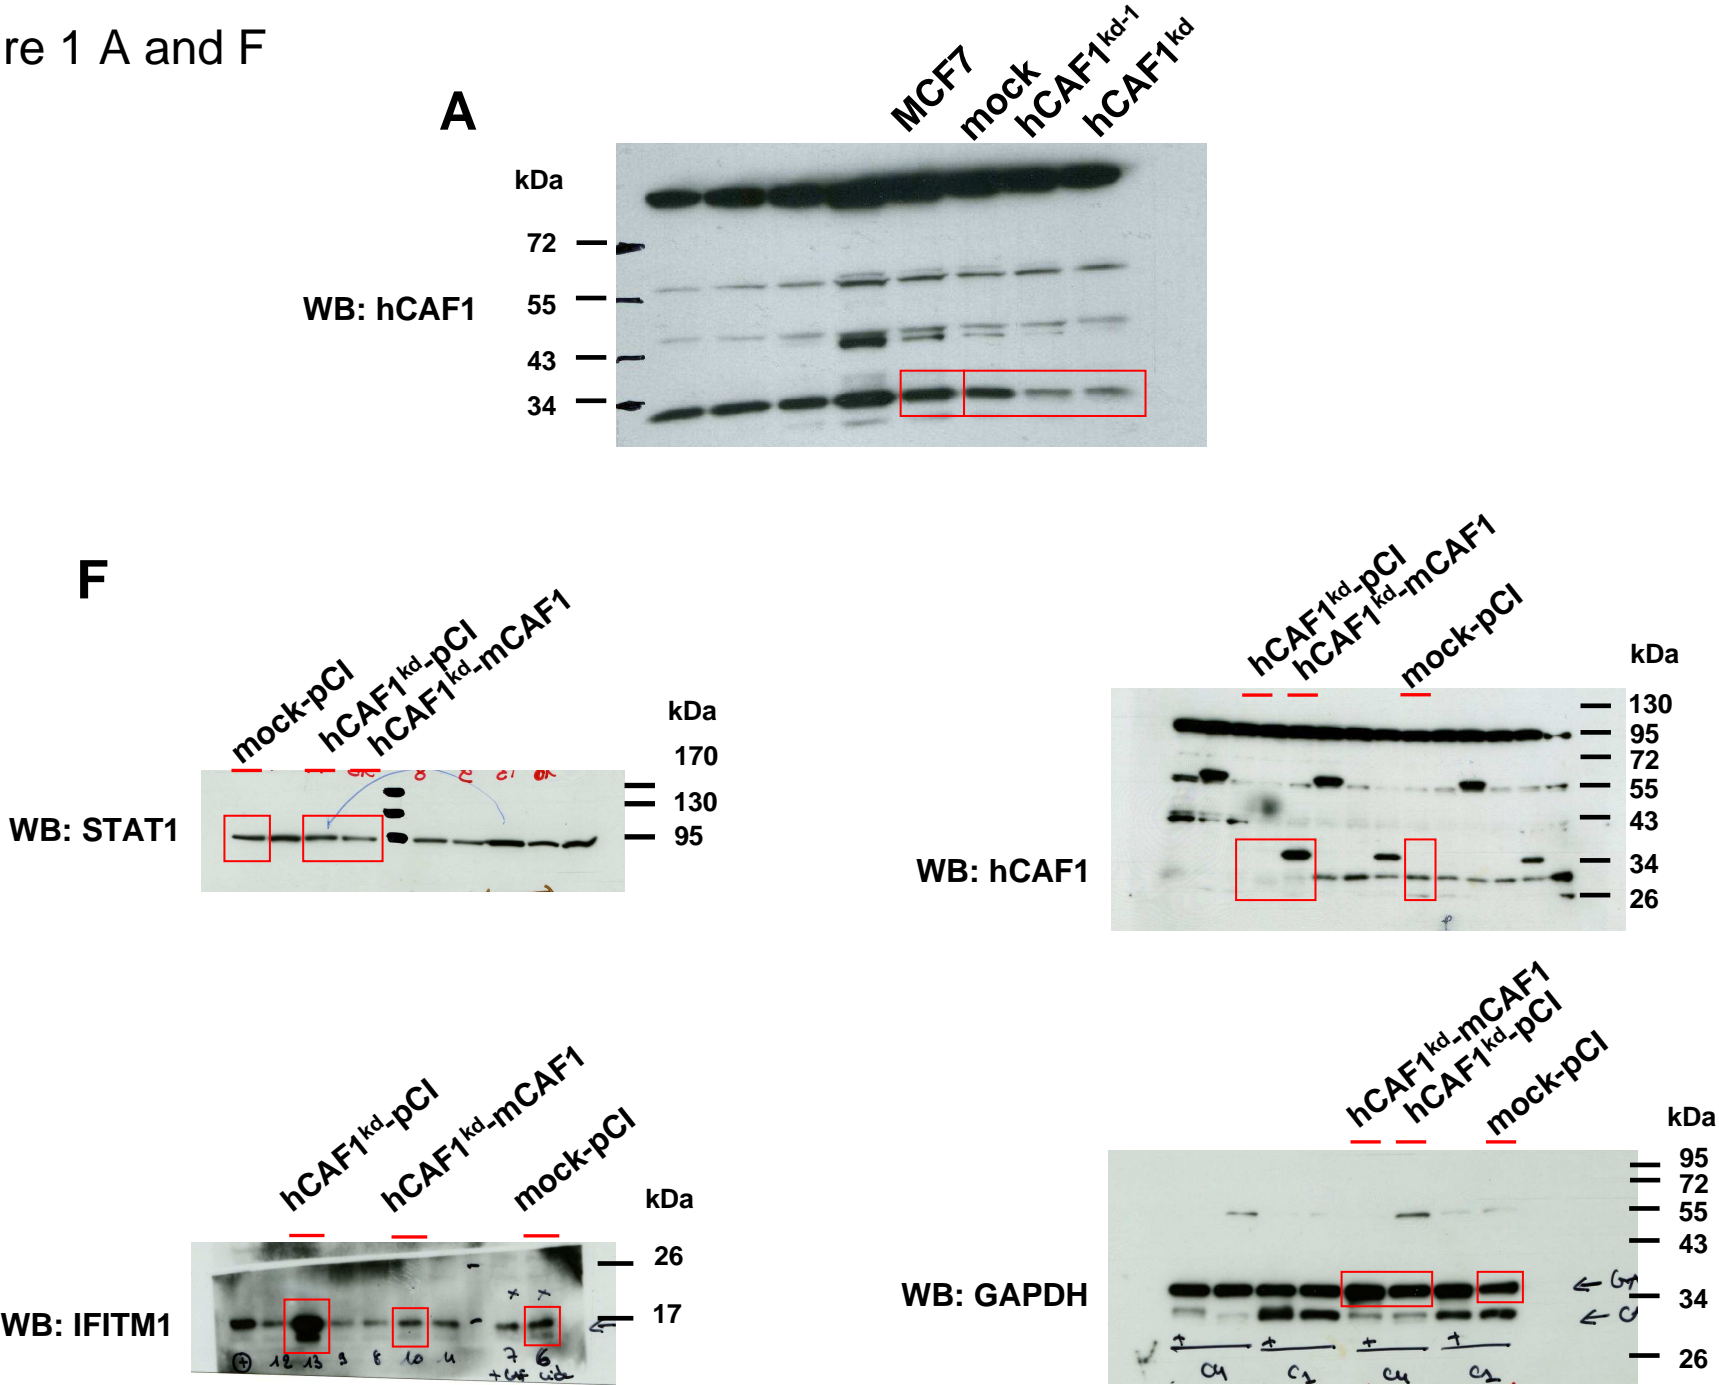

Supplement: emboj201311df1af.pdf [file emboj201311df1af.pdf]

Figure 4A

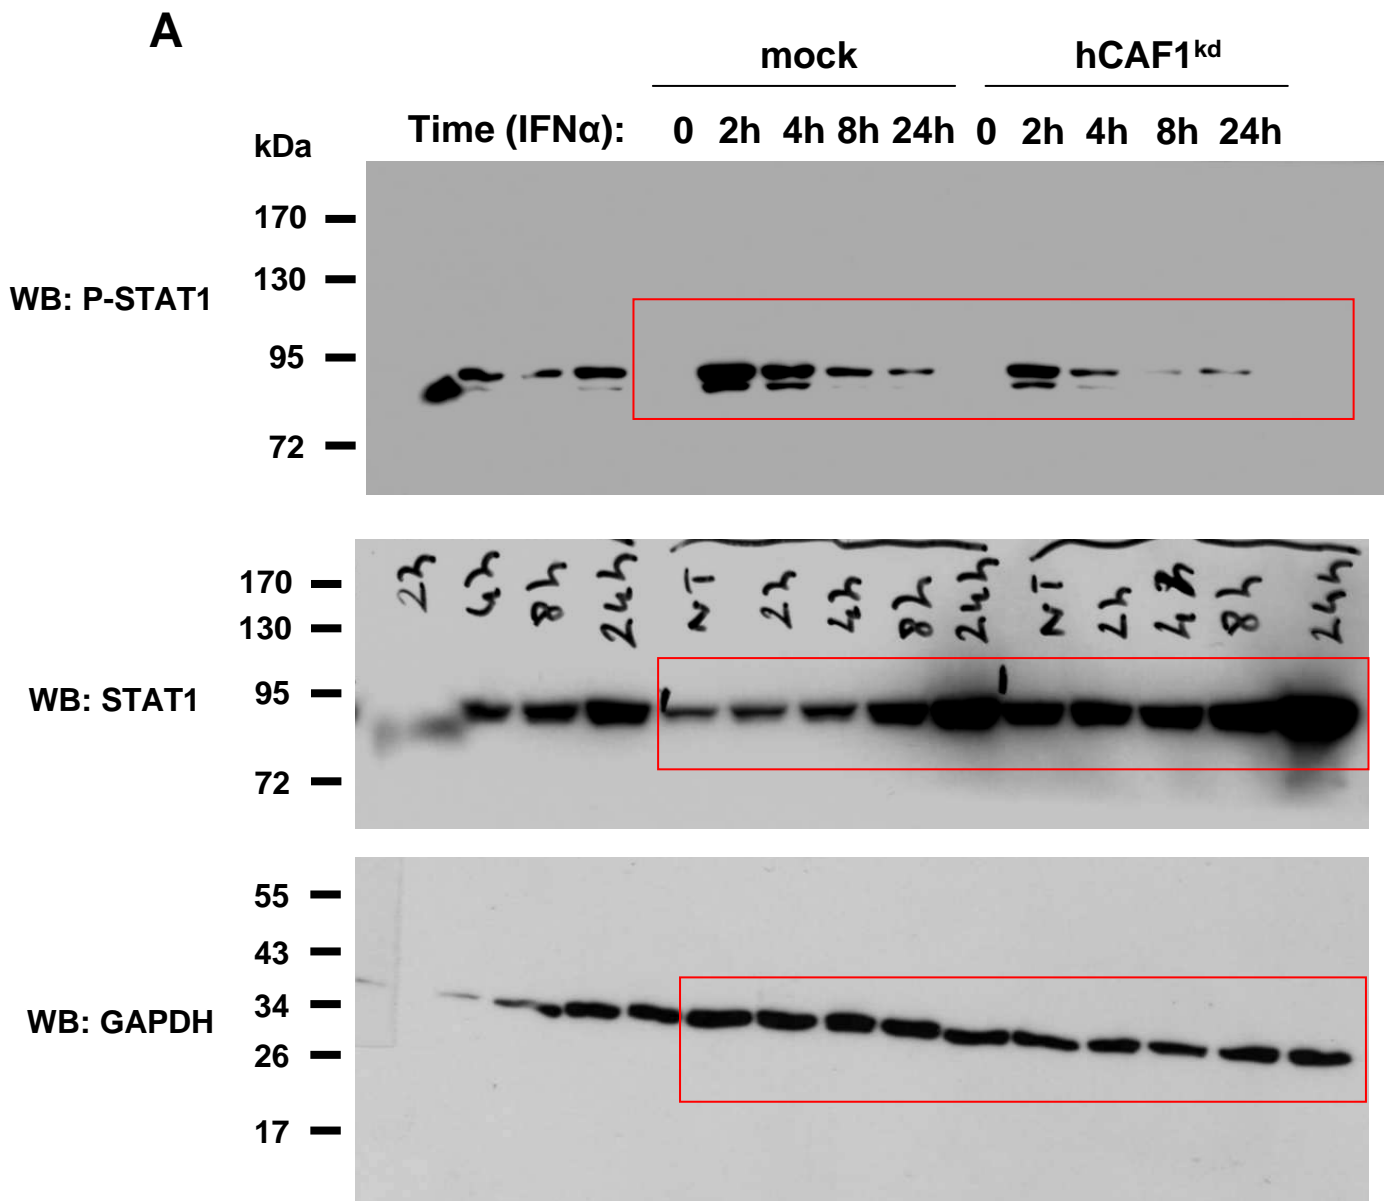

Supplement: emboj201311df4a.pdf [file emboj201311df4a.pdf]

Figure 6A

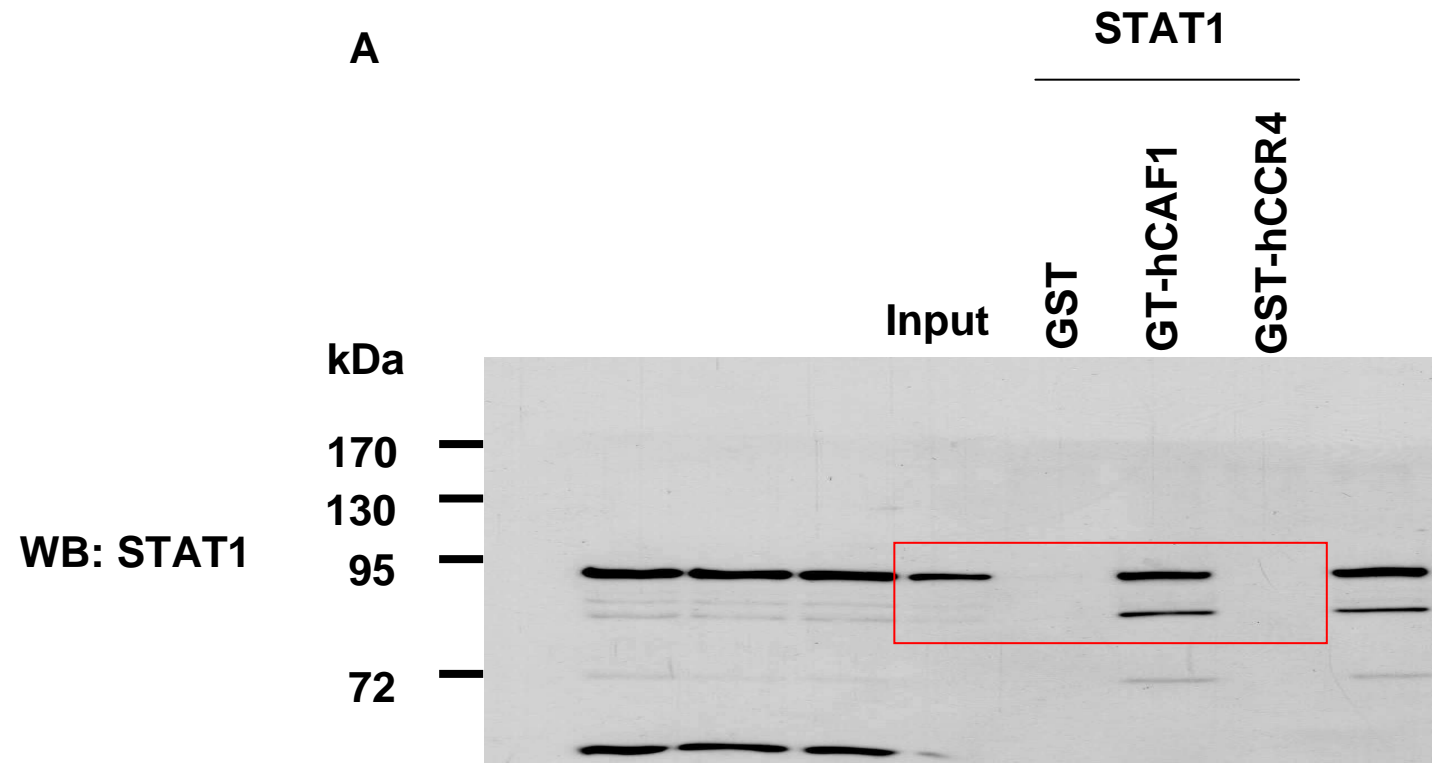

Supplement: emboj201311df6a.pdf [file emboj201311df6a.pdf]

Figure 6B

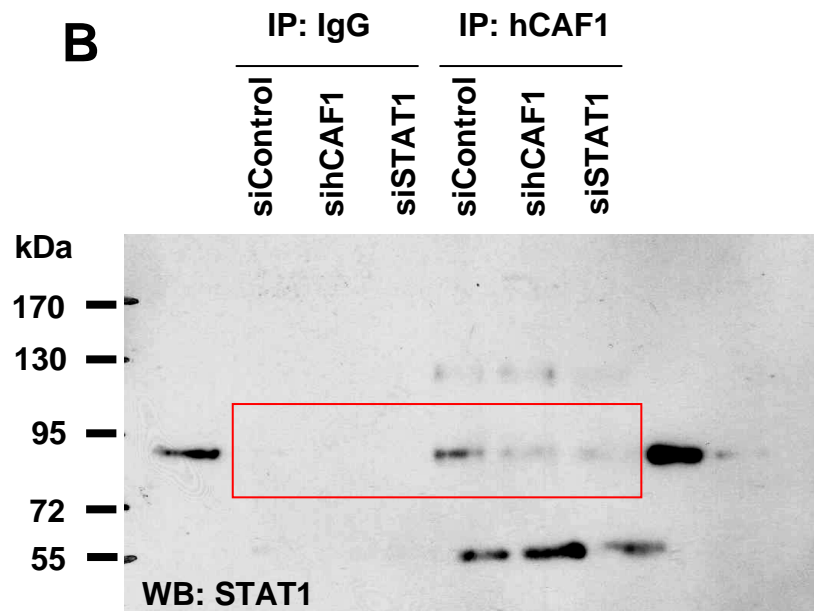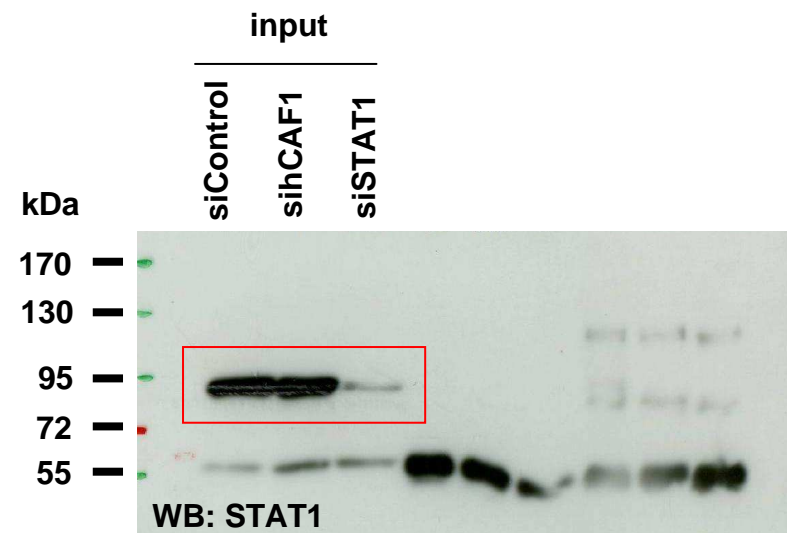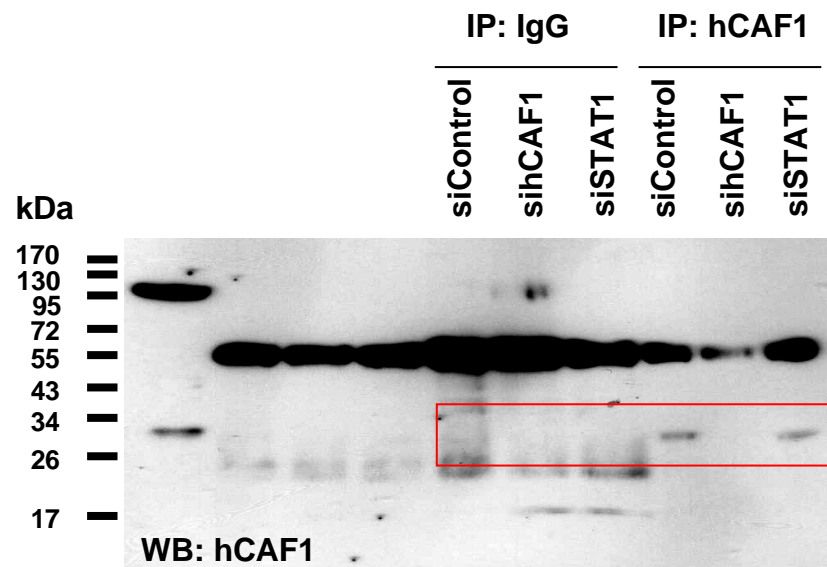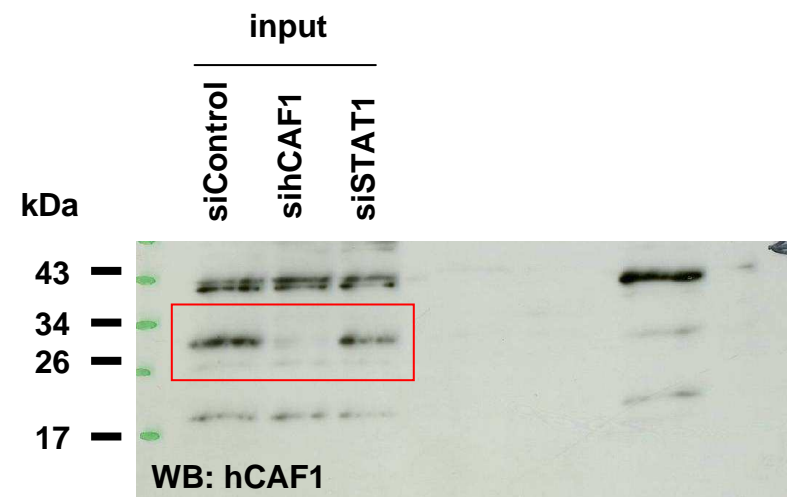

Supplement: emboj201311df6b.pdf [file emboj201311df6b.pdf]

Figure 6C

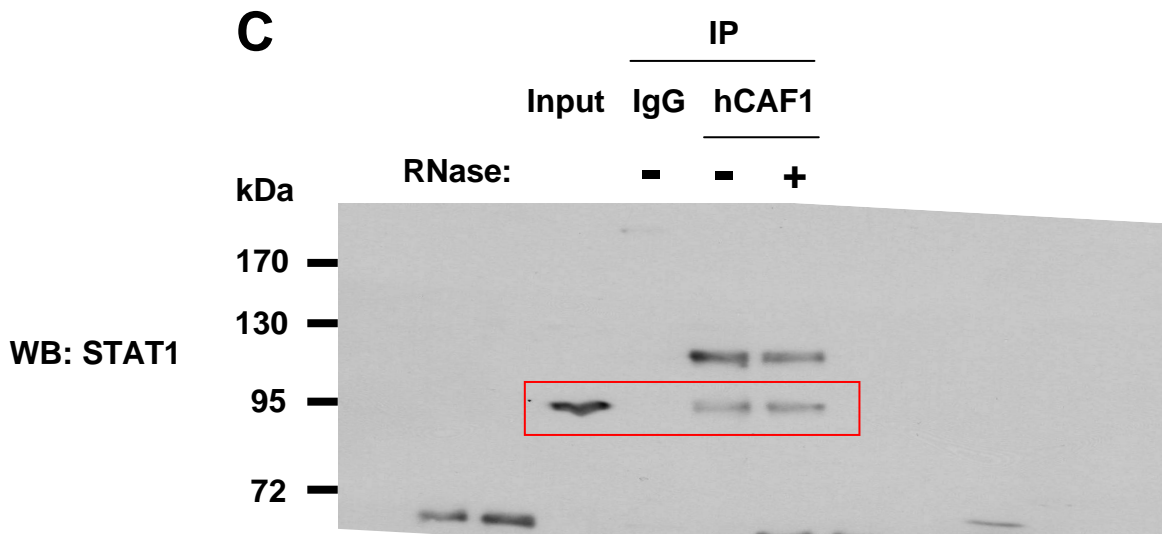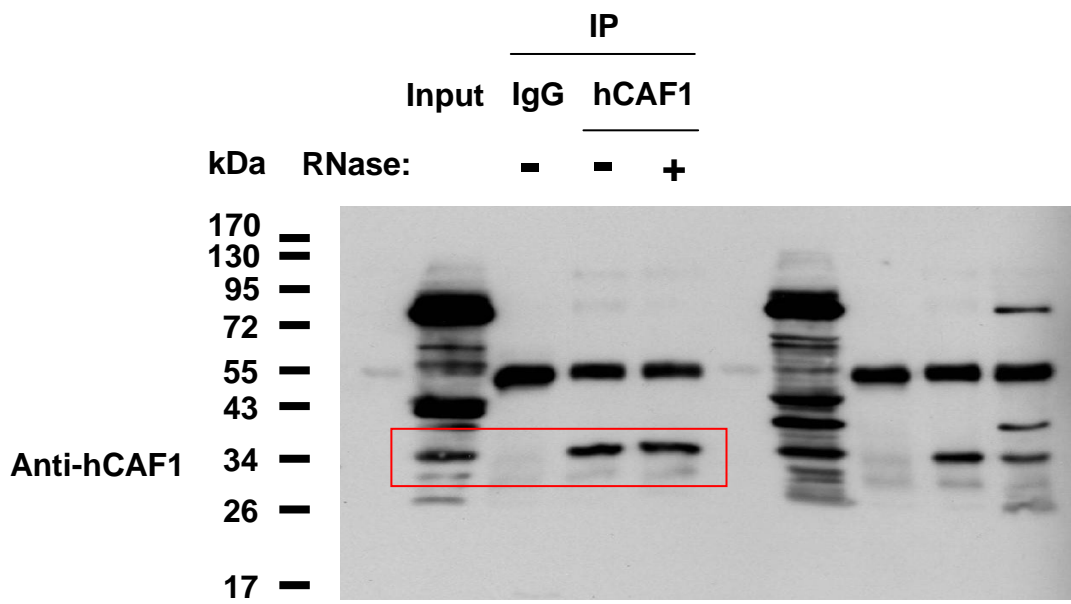

Supplement: emboj201311df6c.pdf [file emboj201311df6c.pdf]

# Supplementary figure 3A

## A

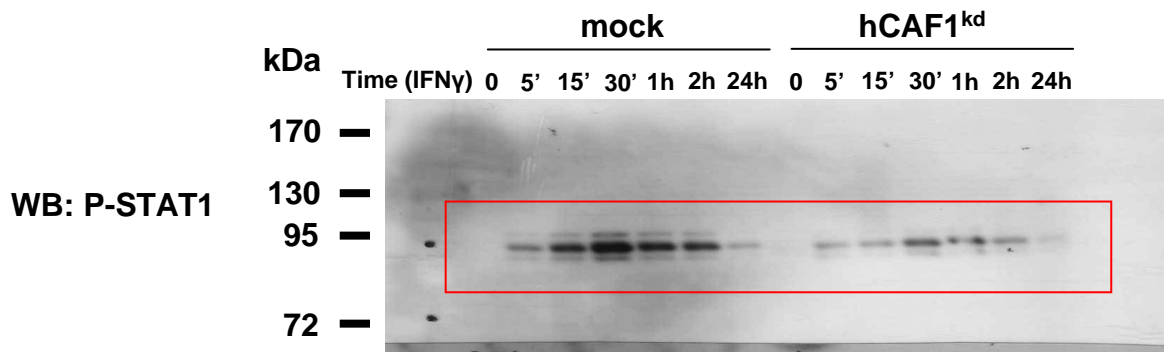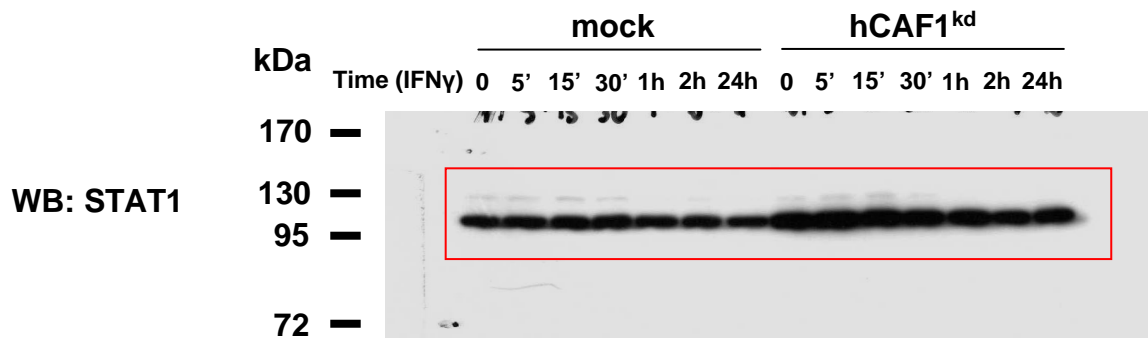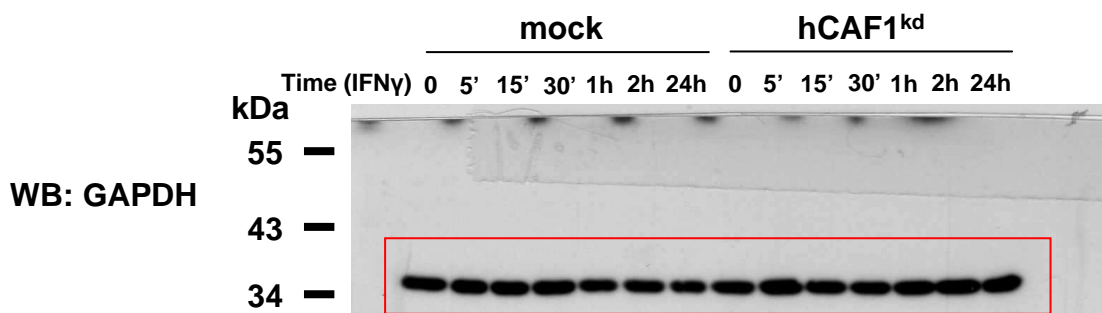

Supplement: emboj201311dfs3.pdf [file emboj201311dfs3.pdf]
